# Supplementary material
Source: publisher site journal article supplement (https://static.cambridge.org/content/id/urn:cambridge.org:id:article:S1047198700012705/resource/name/supplementarytable1.rtf)
Supplement: Supplementary file 1 [file supplementarytable1.rtf]

\documentclass[letterpaper,oneside,fleqn,12pt]{article}

\usepackage[letterpaper,centering]{geometry}

\begin{document}

\begin{table}[ht!]
\caption{Partial replication of Belke and Spies (2008).}
\begin{tabular*}{\textwidth}{cccccc}
\hline
& (1) & (2) & (3) & (4) & (5) \\ 
& POLS & FE & Stage 2 & FEVD & HT \\ \hline
\multicolumn{1}{l}{} & \multicolumn{1}{l}{} & \multicolumn{1}{l}{} & 
\multicolumn{1}{l}{} & \multicolumn{1}{l}{} & \multicolumn{1}{l}{} \\ 
\multicolumn{1}{l}{lngdpim} & \multicolumn{1}{l}{0.88***} & 
\multicolumn{1}{l}{0.68***} & \multicolumn{1}{l}{.} & \multicolumn{1}{l}{
0.68***} & \multicolumn{1}{l}{0.68***} \\ 
\multicolumn{1}{l}{} & \multicolumn{1}{l}{(0.04)} & \multicolumn{1}{l}{(0.11)
} & \multicolumn{1}{l}{.} & \multicolumn{1}{l}{(0.01)} & \multicolumn{1}{l}{
(0.11)} \\ 
\multicolumn{1}{l}{} & \multicolumn{1}{l}{} & \multicolumn{1}{l}{} & 
\multicolumn{1}{l}{} & \multicolumn{1}{l}{} & \multicolumn{1}{l}{} \\ 
\multicolumn{1}{l}{lngdpex} & \multicolumn{1}{l}{0.89***} & 
\multicolumn{1}{l}{0.71***} & \multicolumn{1}{l}{.} & \multicolumn{1}{l}{
0.71***} & \multicolumn{1}{l}{0.71***} \\ 
\multicolumn{1}{l}{} & \multicolumn{1}{l}{(0.03)} & \multicolumn{1}{l}{(0.07)
} & \multicolumn{1}{l}{.} & \multicolumn{1}{l}{(0.01)} & \multicolumn{1}{l}{
(0.07)} \\ 
\multicolumn{1}{l}{} & \multicolumn{1}{l}{} & \multicolumn{1}{l}{} & 
\multicolumn{1}{l}{} & \multicolumn{1}{l}{} & \multicolumn{1}{l}{} \\ 
\multicolumn{1}{l}{lrer} & \multicolumn{1}{l}{-0.01} & \multicolumn{1}{l}{
0.13**} & \multicolumn{1}{l}{.} & \multicolumn{1}{l}{0.13***} & 
\multicolumn{1}{l}{0.13**} \\ 
\multicolumn{1}{l}{} & \multicolumn{1}{l}{(0.01)} & \multicolumn{1}{l}{(0.06)
} & \multicolumn{1}{l}{.} & \multicolumn{1}{l}{(0.01)} & \multicolumn{1}{l}{
(0.06)} \\ 
\multicolumn{1}{l}{} & \multicolumn{1}{l}{} & \multicolumn{1}{l}{} & 
\multicolumn{1}{l}{} & \multicolumn{1}{l}{} & \multicolumn{1}{l}{} \\ 
\multicolumn{1}{l}{ldist} & \multicolumn{1}{l}{-1.27***} & 
\multicolumn{1}{l}{.} & \multicolumn{1}{l}{-1.41***} & \multicolumn{1}{l}{
-1.41***} & \multicolumn{1}{l}{-1.75***} \\ 
\multicolumn{1}{l}{} & \multicolumn{1}{l}{(0.11)} & \multicolumn{1}{l}{.} & 
\multicolumn{1}{l}{(0.04)} & \multicolumn{1}{l}{(0.00)} & \multicolumn{1}{l}{
(0.16)} \\ 
\multicolumn{1}{l}{} & \multicolumn{1}{l}{} & \multicolumn{1}{l}{} & 
\multicolumn{1}{l}{} & \multicolumn{1}{l}{} & \multicolumn{1}{l}{} \\ 
\multicolumn{1}{l}{border} & \multicolumn{1}{l}{-0.00} & \multicolumn{1}{l}{.
} & \multicolumn{1}{l}{0.00**} & \multicolumn{1}{l}{0.00***} & 
\multicolumn{1}{l}{-0.00} \\ 
\multicolumn{1}{l}{} & \multicolumn{1}{l}{(0.00)} & \multicolumn{1}{l}{.} & 
\multicolumn{1}{l}{(0.00)} & \multicolumn{1}{l}{(0.00)} & \multicolumn{1}{l}{
(0.00)} \\ 
\multicolumn{1}{l}{} & \multicolumn{1}{l}{} & \multicolumn{1}{l}{} & 
\multicolumn{1}{l}{} & \multicolumn{1}{l}{} & \multicolumn{1}{l}{} \\ 
\multicolumn{1}{l}{ll} & \multicolumn{1}{l}{-0.16*} & \multicolumn{1}{l}{.}
& \multicolumn{1}{l}{-0.23***} & \multicolumn{1}{l}{-0.23***} & 
\multicolumn{1}{l}{-0.16} \\ 
\multicolumn{1}{l}{} & \multicolumn{1}{l}{(0.10)} & \multicolumn{1}{l}{.} & 
\multicolumn{1}{l}{(0.04)} & \multicolumn{1}{l}{(0.00)} & \multicolumn{1}{l}{
(0.14)} \\ 
&  &  &  &  &  \\ 
\multicolumn{1}{l}{} & \multicolumn{1}{l}{...} & \multicolumn{1}{l}{...} & 
\multicolumn{1}{l}{...} & \multicolumn{1}{l}{...} & \multicolumn{1}{l}{...}
\\ 
&  &  &  &  &  \\ 
\multicolumn{1}{l}{$\delta $} & \multicolumn{1}{l}{.} & \multicolumn{1}{l}{.}
& \multicolumn{1}{l}{.} & \multicolumn{1}{l}{1.00***} & \multicolumn{1}{l}{.}
\\ 
\multicolumn{1}{l}{} & \multicolumn{1}{l}{.} & \multicolumn{1}{l}{.} & 
\multicolumn{1}{l}{.} & \multicolumn{1}{l}{(0.00)} & \multicolumn{1}{l}{.}\\\hline 
\end{tabular*}
{\footnotesize
Notes: One, two, and three asterisks reflect significance at the 0.10, 0.05, and 0.01 confidence levels,
respectively. Robust standard errors are in parentheses.}
\end{table}


\pagestyle{empty}
\end{document}
